# Supplementary material for: ICAM1 expression is induced by proinflammatory cytokines and associated with TLS formation in aggressive breast cancer subtypes
Source: PubMed Central journal article supplement (PMC6079003; doi:10.1038/s41598-018-29604-2), 2018-08-06
Supplement: 41598_2018_29604_MOESM1_ESM.pdf [file 41598_2018_29604_MOESM1_ESM.pdf]

## TITTLE PAGE

**ICAM1 expression is induced by proinflammatory cytokines and associated with TLS formation in aggressive breast cancer subtypes.**

**Stine L. Figenschau<sup>1</sup>, Erik Knutsen<sup>1</sup>, Ilona Urbarova<sup>2</sup>, Christopher Fenton<sup>3</sup>, Bryan Elston<sup>4</sup>, Maria Perander<sup>1</sup>, Elin S. Mortensen<sup>1,5</sup>, Kristin A. Fenton<sup>1</sup>**

<sup>1</sup> RNA and Molecular Pathology Research group, Department of Medical Biology, Faculty of Health Science, UiT – The Arctic University of Norway, N-9037 Tromsø, Norway

<sup>2</sup> Tromsø University Proteomics Platform, Department of Medical Biology, Faculty of Health Science, UiT – The Arctic University of Norway, N-9037 Tromsø, Norway

<sup>3</sup> The Microarray Platform, Faculty of Health Science, UiT – The Arctic University of Norway, N-9037 Tromsø, Norway

<sup>4</sup> Histopath Diagnostic Specialists, Suite 201, 4 Drake Avenue, Building B Pinnacle Office Park, Macquarie Park NSW 2113, Australia

<sup>5</sup> Department of Clinical Pathology, University Hospital of North Norway, N-9038 Tromsø, Norway

Correspondence to:

Kristin A. Fenton, RNA and Molecular Pathology Research Group, Department of Medical Biology, Faculty of Health Sciences, UiT - The Arctic University of Norway, MH-building, 9037 Tromsø, Norway.

Phone: +4777664834.

E-mail: [kristin.fenton@uit.no](mailto:kristin.fenton@uit.no)

**Table S1.** R script for differential expression analysis in DESeq2

**Tumor vs. Normal:**

```
#load counts
counts <- read.table("counts.tab", header=T, row.names=1, sep="\t")

#clean pheno file
pheno <- rep("N", ncol(counts))
pheno[grep("T", colnames(counts))] <- "T"

#sync counts with pheno
#remove empty reads
counts <- counts[which(rowSums(counts) > 0),]

pheno <- cbind("ID"=colnames(counts), "pheno"=pheno)
rownames(pheno) <- pheno[,1]

#DESeq2
library(DESeq2)

dds <- DESeqDataSetFromMatrix(countData = counts, colData=pheno, design = ~
pheno)
res <- results(dds, lfcthreshold=2) #logFoldChange greater or around 2
res <- res[which(res$baseMean > 10),] #remove low count transcripts
res <- res[which(res$padj < 0.05),] #only those that have a padj less than
0.05
res <- res[order(res$padj),] #order by padjust

library(gProfiler)

#annotate
xx <- gconvert(rownames(res), organism = "hsapiens", target = "ENSG",
region_query = F, numeric_ns = "",
mthreshold = Inf, filter_na = T, df = T)
dups <- which(duplicated(xx[,2]))
xx <- xx[-dups,]
rownames(xx) <- tolower(xx[,2])
test <- as.data.frame(res)
dd <- cbind(test, xx[rownames(test),])

write.table(dd, "kristin_tumour_normal.tab", sep="\t")
png("kristin_up_down.png")
plotCounts(dds, "uc003thr.4", intgroup="pheno")
dev.off()
```

**Table S2.** R script for differential expression analysis in DESeq2

**TLS pos vs. negative:**

```
#load counts
counts <- read.table("counts.tab", header=T, row.names=1, sep="\t")
#clean pheno file
pheno <- read.table("New_groups.txt", header=T, sep="\t")
pheno <- pheno[!is.na(pheno[, ncol(pheno)]),]
rownames(pheno) <- paste(paste("x", pheno$ID, sep=""), "T", sep="")
rownames(pheno) <- gsub("xT", "x", rownames(pheno))
#sync counts with pheno
counts <- counts[, rownames(pheno)]
#remove empty reads
counts <- counts[which(rowSums(counts) > 0),]
#DEseq2
library(DESeq2)
pheno$Nye.Grupper <- as.factor(pheno$Nye.Grupper)
dds <- DESeqDataSetFromMatrix(countData = counts,
colData=pheno, design = ~ Nye.Grupper)
#normalized principle component
library(matrixStats)
library(genefilter)
ntop <- 500
rld <- rlog(dds, blind=FALSE)
rv <- rowVars(assay(rld))
select <- order(rv, decreasing = TRUE)[seq_len(min(ntop,length(rv)))]
pca <- prcomp(t(assay(rld)[select, ]))
colors <- as.character(pheno[rownames(pca$x), "Nye.Grupper"]) colors[colors ==
"1"] <- "blue"
colors[colors == "2"] <- "red"
png("normalized_pca_inflamed_vs_non_tumour.png", width=800, height=800)
plot(pca$x[,1], pca$x[,2], col=colors, pch=20) labels <-
paste(rownames(pca$x), pheno[rownames(pca$x), "Nye.Grupper"], sep="_")
text(pca$x[,1], pca$x[,2], labels, pos=2)
dev.off()
#dds analysis
dds <- DESeq(dds)
res <- results(dds)
sig <- res[which(res$pvalue < 0.05),] #too many
sig <- sig[which(sig$padj < 0.1),] #too few with padj 0.05
sig <- sig[which(sig$baseMean > 10),] #too many with very low means
#annotate
library(gProfiler)
xx <- gconvert(rownames(sig), organism = "hsapiens", target =
"ENTREZGENE_ACC", region_query = F,numeric_ns = "", mthreshold = Inf,
filter_na = T, df = T)
annot <- cbind(sig[as.character(tolower(xx[,2]))], xx)
path <- gprofiler(unique(as.character(xx$name)), organism = "hsapiens")
#results
write.table(annot, "DEseq_inflamed_non_inflamed_tumour.txt", sep="\t")
write.table(path, "DESeq_inflamed_pathways.txt", sep="\t")
```

**Table S3.** The amount of reads gained from SAGE sequencing.

| Sample name | No. of raw reads <sup>1</sup> | No. of mapped SAGE tags <sup>2</sup> | % of mapped SAGE tags <sup>3</sup> |
|-------------|-------------------------------|--------------------------------------|------------------------------------|
| SAGE_1T     | 24,258,091                    | 15,635,747                           | 64.5                               |
| SAGE_3T     | 31,994,239                    | 22,032,673                           | 68.9                               |
| SAGE_4T     | 27,083,634                    | 17,166,279                           | 63.4                               |
| SAGE_6T     | 25,124,284                    | 17,469,710                           | 69.5                               |
| SAGE_7T     | 28,390,731                    | 18,592,583                           | 65.5                               |
| SAGE_9T     | 22,038,727                    | 15,183,800                           | 68.9                               |
| SAGE_10T    | 23,928,559                    | 15,617,125                           | 65.3                               |
| SAGE_11T    | 19,578,639                    | 13,898,273                           | 71.0                               |
| SAGE_12T    | 17,530,938                    | 10,975,834                           | 62.6                               |
| SAGE_13T    | 14,968,593                    | 10,050,627                           | 67.1                               |
| SAGE_15T    | 16,579,277                    | 10,450,145                           | 63.0                               |
| SAGE_16T    | 23,487,429                    | 15,651,523                           | 66.6                               |
| SAGE_17T    | 18,818,245                    | 13,272,280                           | 70.5                               |
| SAGE_18T    | 18,570,125                    | 13,024,410                           | 70.1                               |
| SAGE_20T    | 23,858,957                    | 15,148,028                           | 63.5                               |
| SAGE_21T    | 28,704,826                    | 20,521,979                           | 71.5                               |
| SAGE_22T    | 24,963,695                    | 17,859,750                           | 71.5                               |
| SAGE_24T    | 22,028,079                    | 15,559,328                           | 70.6                               |
| SAGE_25T    | 20,377,702                    | 15,245,459                           | 74.8                               |
| SAGE_26T    | 40,919,575                    | 31,972,672                           | 78.1                               |
| SAGE_27T    | 25,596,230                    | 14,629,812                           | 57.2                               |
| SAGE_30T    | 18,867,822                    | 13,284,918                           | 70.4                               |
| SAGE_31T    | 15,744,015                    | 8,997,525                            | 57.2                               |
| SAGE_1N     | 45,402,414                    | 26,550,066                           | 58.5                               |
| SAGE_3N     | 36,374,516                    | 25,581,619                           | 70.3                               |
| SAGE_4N     | 39,144,024                    | 27,277,375                           | 69.7                               |
| SAGE_6N     | 26,433,945                    | 16,552,837                           | 62.6                               |
| SAGE_7N     | 32,676,707                    | 23,166,747                           | 70.9                               |
| SAGE_9N     | 36,049,982                    | 25,041,739                           | 69.5                               |
| SAGE_10N    | 35,718,425                    | 26,435,374                           | 74.0                               |
| SAGE_11N    | 29,510,280                    | 18,878,549                           | 64.0                               |
| SAGE_12N    | 33,231,009                    | 24,714,464                           | 74.4                               |
| SAGE_13N    | 27,230,170                    | 19,016,580                           | 69.8                               |
| SAGE_14N    | 27,595,512                    | 18,745,805                           | 67.9                               |
| SAGE_15N    | 18,915,521                    | 12,325,515                           | 65.2                               |
| SAGE_16N    | 16,193,475                    | 11,207,480                           | 69.2                               |
| SAGE_17N    | 27,621,901                    | 18,502,102                           | 67.0                               |
| SAGE_18N    | 20,753,933                    | 14,083,017                           | 67.9                               |
| SAGE_20N    | 20,130,803                    | 12,262,315                           | 60.9                               |
| SAGE_21N    | 22,473,505                    | 12,455,426                           | 55.4                               |
| SAGE_22N    | 19,623,149                    | 13,774,768                           | 70.2                               |
| SAGE_23N    | 19,750,852                    | 13,249,316                           | 67.1                               |
| SAGE_24N    | 17,813,930                    | 11,789,423                           | 66.2                               |
| SAGE_25N    | 26,411,798                    | 17,838,380                           | 67.5                               |
| SAGE_26N    | 99,480,765                    | 71,968,531                           | 72.3                               |
| SAGE_27N    | 23,354,973                    | 17,036,342                           | 73.0                               |
| SAGE_30N    | 29,471,098                    | 16,642,362                           | 56.5                               |
| SAGE_31N    | 25,819,634                    | 18,290,879                           | 70.8                               |

<sup>1</sup> Number of raw reads gained by SOLiD SAGE sequencing.

<sup>2</sup> Number of 26bp tags mapping to human genome reference GRCh38 in color space using bowtie.

<sup>3</sup> Percentage of SAGE tags mapped from the amount of raw reads gained by SAGE sequencing.

Figure S1

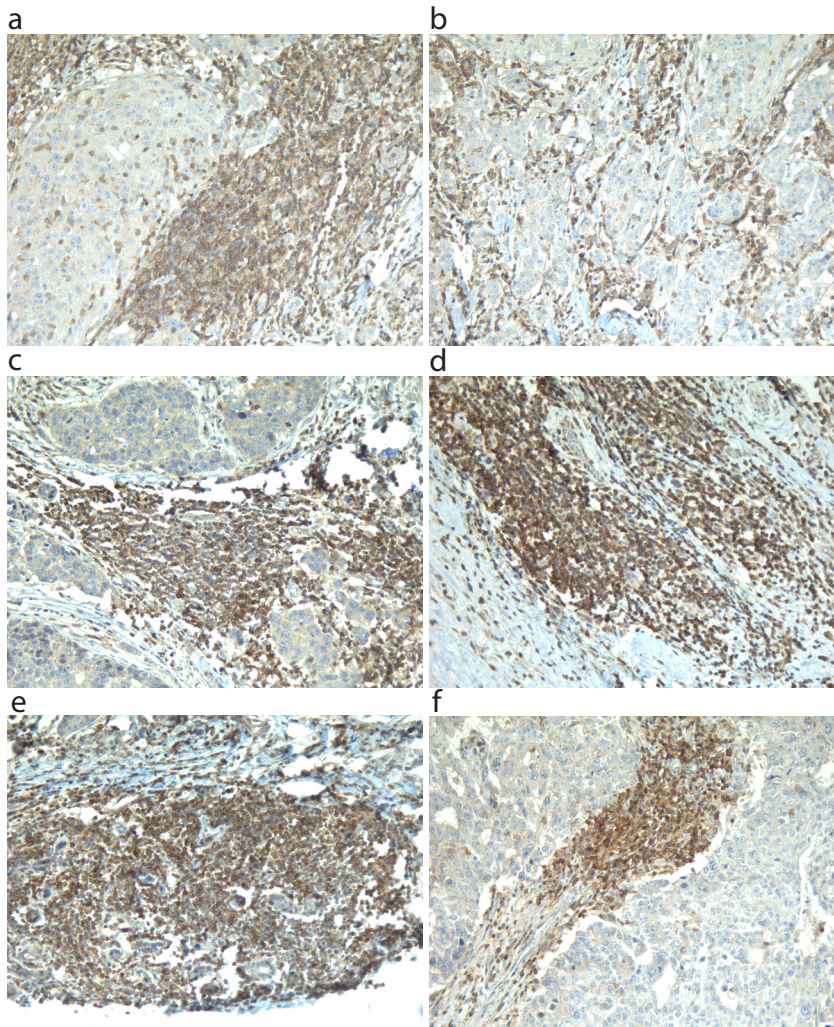

**Figure S1: ITGAL expression in breast cancer patients.**

Tumor sections from TNBC patients showing ITGAL immunoreactivity in **(a)** immune cell aggregates in close proximity to the tumor cells, and **(b)** in tumor-associated stroma. Prominent ITGAL expression was detected in tumor-associated TLS both **(c, d)** in the central tumor and **(e, f)** the periphery of the tumor. Original magnification, X200.

Figure S2

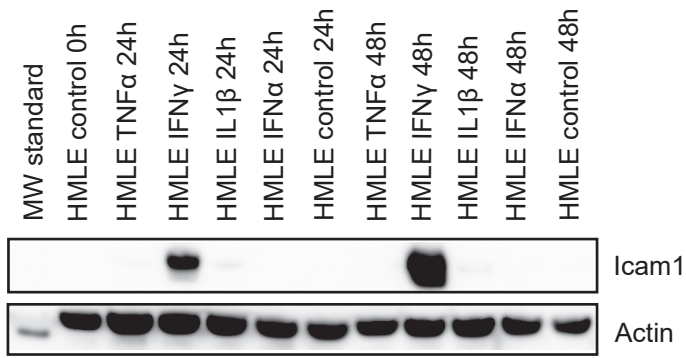

**a**

**b**

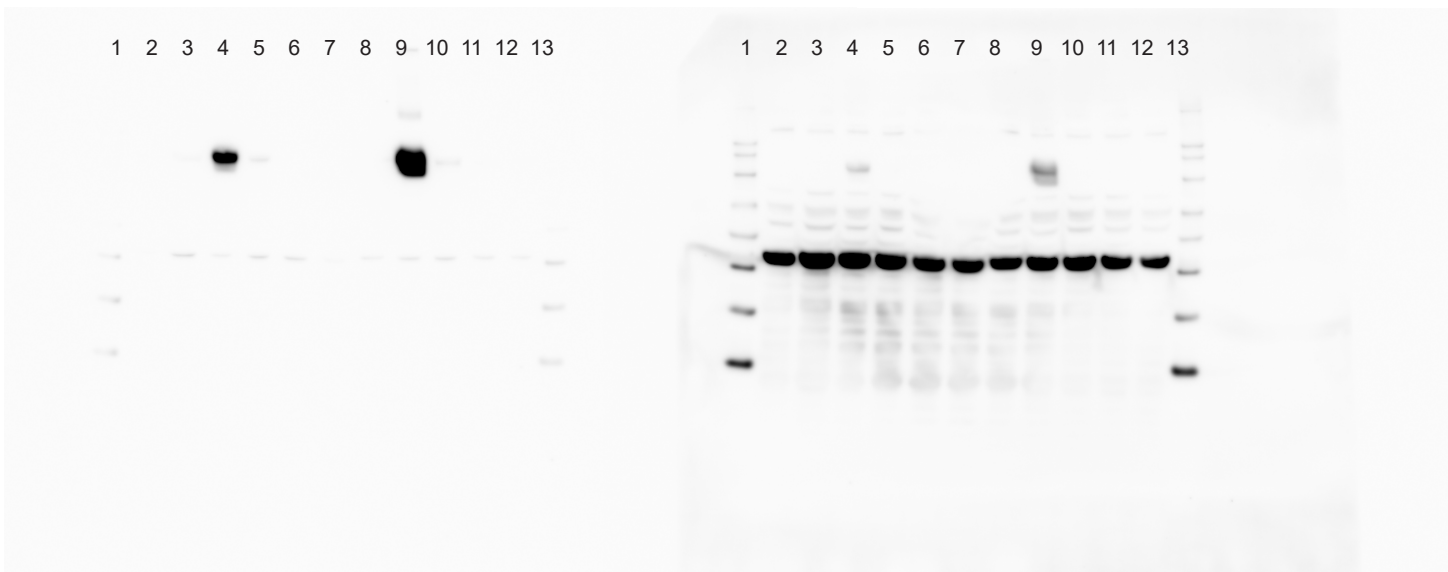

**Figure S2. Full-length membranes of ICAM1 expression in HMLE cells after stimulation with proinflammatory cytokines. (a)** Lane 1 and 13: Magic marker MW standard. Lane 2: control after 0h. Lane 3: TNF $\alpha$  24h. Lane 4: IFN $\gamma$  24 h. Lane 5: IL1 $\beta$  24h. Lane 6: IFN $\alpha$  24h. Lane 7: Control 24h. Lane 8: TNF $\alpha$  48h Lane 9: IFN $\gamma$  48 h. Lane 10: IL1 $\beta$  48h. Lane 11: IFN $\alpha$  48h. Lane 12: control 48h. **(b)** Actin beta of the membrane in a.)

Figure S3

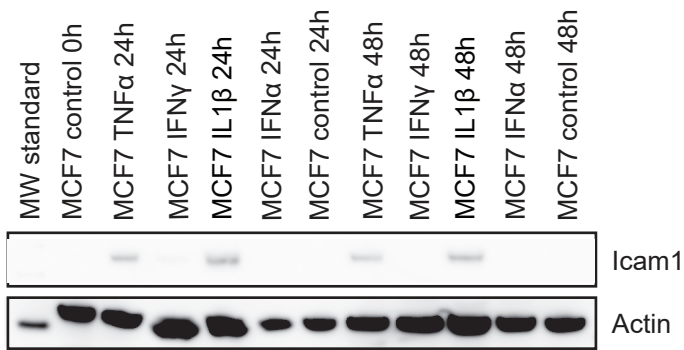

**a**

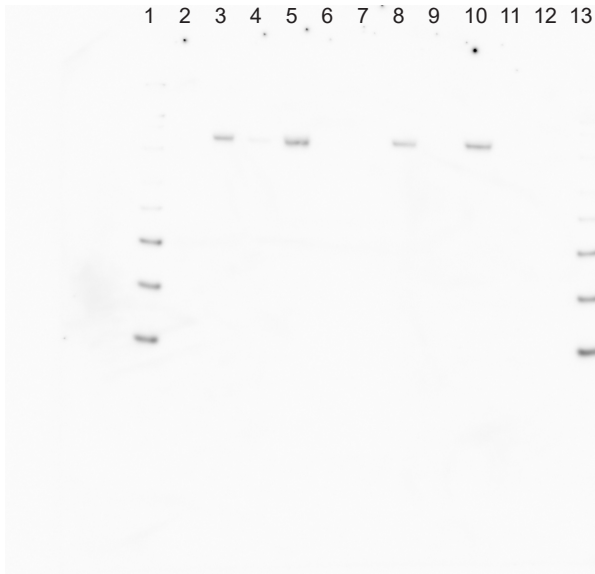

**b**

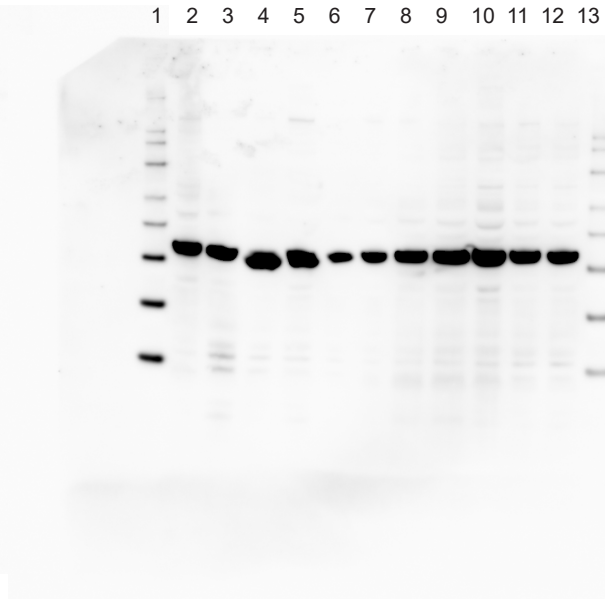

**Figure S3. Full-length gels of ICAM1 expression in MCF7 cells after stimulation with proinflammatory cytokines.** (a) Lane 1 and 13: Magic marker MW standard. Lane 2: nonstimulated MCF7 cells after 0h. Lane 3-6: MCF7 cells stimulated with TNF $\alpha$  (lane 3), IFN $\gamma$  (lane 4), IL1 $\beta$  (lane 5) and IFN $\alpha$  (lane 6) for 24h. Lane 7: nonstimulated MCF7 cells at 24h. Lane 8-11: MCF7 cells stimulated with TNF $\alpha$  (lane 8), IFN $\gamma$  (lane 9), IL1 $\beta$  (lane 10) and IFN $\alpha$  (lane 11) for 48h. Lane 12: nonstimulated MCF7 cells at 24h (b) Actin beta detection of the membrane in a.

Figure S4

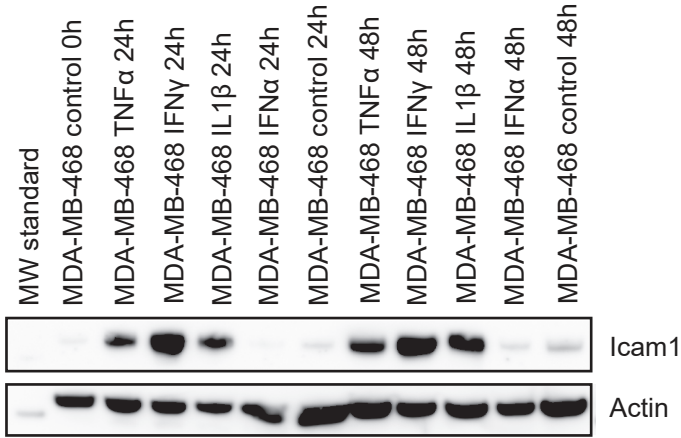

**a**

1 2 3 4 5 6 7 8 9 10 11 12 13

**b**

1 2 3 4 5 6 7 8 9 10 11 12 13

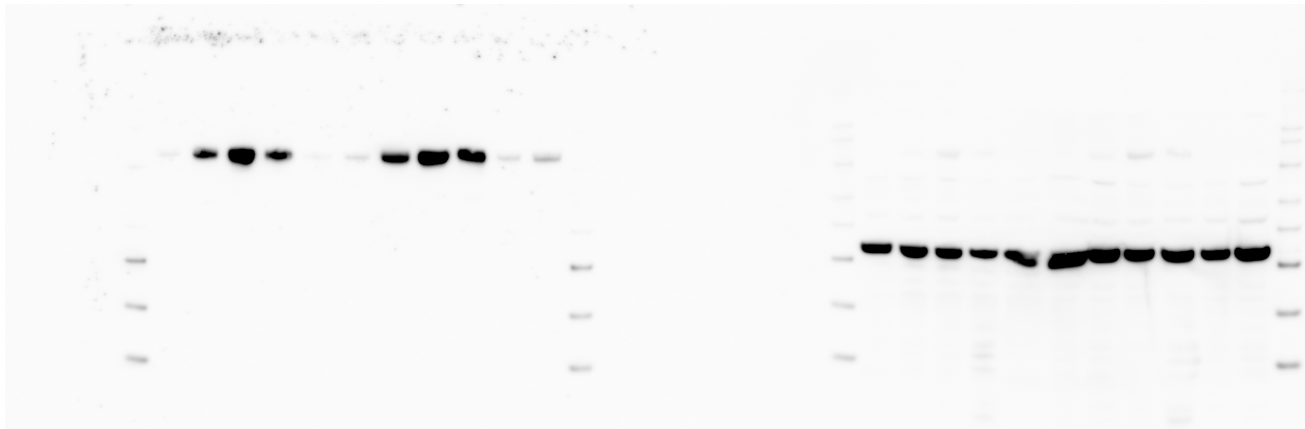

**Figure S4. Full-length gels of ICAM1 expression in MDA-MD-468 cells after stimulation with proinflammatory cytokines.** (a) Lane 1 and 13: Magic marker MW standard. Lane 2: nonstimulated MDA-MD-468 cells after 0h. Lane 3-6: MDA-MD-468 cells stimulated with TNF $\alpha$  (lane 3), IFN $\gamma$  (lane 4), IL1 $\beta$  (lane 5) and IFN $\alpha$  (lane 6) for 24h. Lane 7: nonstimulated MDA-MD-468 cells at 24h. Lane 8-11: MDA-MD-468 cells stimulated with TNF $\alpha$  (lane 8), IFN $\gamma$  (lane 9), IL1 $\beta$  (lane 10) and IFN $\alpha$  (lane 11) for 48h. Lane 12: nonstimulated MCF7 cells at 48h (b) Actin beta detection of the membrane in a.



Figure S5

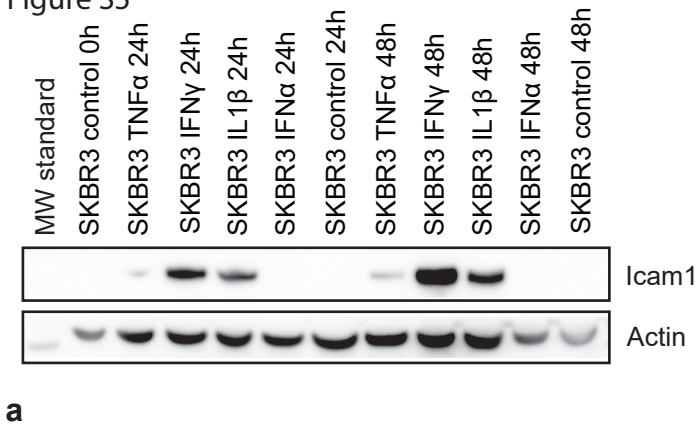

1 2 3 4 5 6 7 8 9 10 11 12 13

1 2 3 4 5 6 7 8 9 10 11 12 13

**Figure S5. Full-length gels of ICAM1 expression in SKBR3 cells after stimulation with proinflammatory cytokines.** (a) Lane 1 and 13: Magic marker MW standard. Lane 2: nonstimulated SKBR3 cells after 0h. Lane 3-6: SKBR3 cells stimulated with TNF $\alpha$  (lane 3), IFN $\gamma$  (lane 4), IL1 $\beta$  (lane 5) and IFN $\alpha$  (lane 6) for 24h. Lane 7: nonstimulated SKBR3 cells at 24h. Lane 8-11: SKBR3 cells stimulated with TNF $\alpha$  (lane 8), IFN $\gamma$  (lane 9), IL1 $\beta$  (lane 10) and IFN $\alpha$  (lane 11) for 48h. Lane 12: nonstimulated SKBR3 cells at 48h (b) Actin beta detection of the membrane in a.
